# Supplementary material
Source: PubMed Central journal article supplement (PMC4053573)
Supplement: NIHMS482892-supplement-01.pdf [file NIHMS482892-supplement-01.pdf]

**Supplemental Material****IKK $\beta$  in intestinal epithelial cells regulates allergen-specific IgA and allergic inflammation  
at distant mucosal sites**

Astrid Bonnégarde-Bernard<sup>a,b</sup>, Junbae Jee<sup>a</sup>, Michael J. Fial<sup>a</sup>, Famke Aeffner<sup>a</sup>, Estelle Cormet-Boyaka<sup>c</sup>,

Ian C. Davis<sup>a</sup>, Mingqun Lin<sup>a</sup>, Daniel Tomé<sup>b</sup>, Michael Karin<sup>d</sup>, Yan Sun<sup>e</sup>, and Prosper N. Boyaka<sup>a,c</sup>

*<sup>a</sup>Department of Veterinary Biosciences, <sup>c</sup>Department of Internal Medicine,  
The Ohio State University, Columbus, OH, USA*

*<sup>b</sup>Laboratory of Human Nutrition, AgroParisTech, Paris, France*

*<sup>d</sup>Department of Pharmacology, University of California, San Diego, La Jolla, CA, USA*

*<sup>e</sup>Research Testing Laboratory, Lubbock, TX, USA*

**Running head:** Intestinal epithelial cell IKK $\beta$  regulates allergy

**Address correspondence:** Dr. Prosper N. Boyaka. The Ohio State University, Dept. of Veterinary Biosciences, VMAB, 1900 Coffey Road, Columbus, OH 43210.

Telephone #: (614) 247-4671 Fax #: (614) 292-6473. Email: boyaka.1@osu.edu.

## Supplemental Materials and Methods

### *Analysis of gut microbiota*

The bacterial tag-encoded FLX amplicon pyrosequencing (bTEFAP) (Roche Titanium 454 FLX pyrosequencing platform) was used for detection and identification of the primary populations of microbes in fecal pellet samples. Briefly, freshly emitted fecal pellets samples were collected, snap frozen and stored at  $-80^{\circ}\text{C}$ . Samples were collected twice a day from each individual mouse and pooled to minimize potential daily variation of the microbiota. Bacterial DNA was extracted by conventional methods (Qiagen, Valencia, CA), and 16S rRNA genes were amplified with the modified 16S Eubacterial primers 28F, 5'-GAG TTT GAT CNT GGC TCA G-3' and 519R, 5'-GTN TTA CNG CGG CKG CTG-3' for amplifying the 500 bp region of 16S rRNA genes. The primer sets used for FLX-Titanium amplicon pyrosequencing were designed with adding linker A and 8 base pair barcode sequence at the 5' end of forward primers as follow: 28F-A, 5'-CCA TCT CAT CCC TGC GTG TCT CCG ACT CAG-barcode-GAG TTT GAT CNT GGC TCA G-3'. The biotin and linker B sequence at the 5' end of reverse primer 519R-B: 5'-Biotin-CCT ATC CCC TGT GTG CCT TGG CAG TCT CAG GTN TTA CNG CGG CKG CTG-3'. HotStarTaq Plus Master Mix Kit (QIAGEN, CA, USA) was used for PCR under the following conditions:  $95^{\circ}\text{C}$  for 5 minutes followed by 35 cycles of  $95^{\circ}\text{C}$  for 30 second;  $54^{\circ}\text{C}$  for 40 second and  $72^{\circ}\text{C}$  for 1 minute, a final elongation step at  $72^{\circ}\text{C}$  for 10 minutes was also included. The PCR products were cleaned by using Diffinity Rapid Tip (Diffinity Genomics, Inc, West Henrietta, NY), and the small fragments were removed by using Agencourt Ampure Beads (Beckman Coulter, CA, USA).

Bacterial tag-encoded FLX-Titanium amplicon pyrosequencing (bTEFAP) was performed as described previously <sup>1</sup>. In preparation for FLX-Titanium sequencing (Roche, Nutley, New

Jersey), DNA fragment sizes and concentration were accurately measured using DNA chips under a Bio-Rad Experion Automated Electrophoresis Station (Bio-Rad Laboratories, CA, USA) and a TBS-380 Fluorometer (Turner Biosystems, CA, USA). A sample of double-stranded DNA, 9.6 million molecules/ml, with an average size of 625 bp were combined with 9.6 million DNA capture beads, and then amplified by emulsion PCR. After bead recovery and bead enrichment, the bead attached DNAs were denatured with NaOH, and sequencing primers (Roche) were annealed. A four-region 454 sequencing run was performed on a GS PicoTiterPlate (PTP) using the Genome Sequencer FLX System (Roche). Forty tags were used on each quarter region of the PTP. All FLX procedures were performed using Genome Sequencer FLX System manufacturer's instructions (Roche). After denoising (USEARCH application) and chimera removal (UCHIIME in *de novo* mode), the sequences were clustered into *operational taxonomic units (OTU)* clusters with 96.5% identity (3.5% divergence) using USEARCH and the seed sequence put into a FASTA formatted sequence file. The FASTA files were then queried against a database of high quality sequences derived from NCBI using a distributed .NET algorithm that utilizes BLASTN+ (KrakenBLAST [www.krakenblast.com](http://www.krakenblast.com)). For identification of segmented filamentous bacteria, blast search was performed with the fasta sequences against *Candidatus Arthromitus* (taxid:49082) genome sequences (*Candidatus Arthromitus* sp. SFB-mouse-Yit and *Candidatus Arthromitus* sp. SFB-mouse-Japan), using Megablast (optimized for highly similar sequences;  $\geq 95\%$ ) and E-values below  $1e-15$ .

## Reference

1. Dowd SE, Wolcott RD, Sun Y, McKeethan T, Smith E, Rhoads D. Polymicrobial nature of chronic diabetic foot ulcer biofilm infections determined using bacterial tag encoded FLX amplicon pyrosequencing (bTEFAP). PLoS One 2008;3:e3326.

## Supplemental Figure Legends

**Figure S1. STAT3 responses in gut tissues of IKK $\beta^{\Delta\text{IEC}}$  after oral administration of cholera toxin.** Control IKK $\beta$ -competent C57BL/6 mice and IKK $\beta^{\Delta\text{IEC}}$  mice were orally administered cholera toxin (10  $\mu\text{g}$ ) by intragastric gavage. After 16 h, mice were euthanized and small intestines were collected. Tissue sections were labeled with anti-pSTAT3 Ab and counter-stained with hematoxylin and eosin (Original magnification: x40). The figure is representative of at least three independent experiments.

**Figure S2. Cholera toxin does not induce fluid accumulation in the gut of IKK $\beta^{\Delta\text{IEC}}$  mice.** Control IKK $\beta$ -competent C57BL/6 mice and IKK $\beta^{\Delta\text{IEC}}$  mice were orally administered cholera toxin (10  $\mu\text{g}$ ) by intragastric gavage. Mice were euthanized 10 or 16 hours later and intestinal fluid accumulation was evaluated by measuring the weight of intestine. The results are expressed as mean percentage of intestine weight over whole mouse body weight. (\*,  $p < 0.05$  compared to control C57BL/6 mice).

**Figure S3. Oral cholera toxin treatment alters the distribution of bacteria families in the gut of IKK $\beta^{\Delta\text{IEC}}$  mice.** Control IKK $\beta$ -competent C57BL/6 mice and IKK $\beta^{\Delta\text{IEC}}$  mice were orally administered cholera toxin (10  $\mu\text{g}$ ) by intragastric gavage and fecal pellets were collected before (day 0) and 2 and 4 days later. The composition of the bacterial community was analyzed by pyrosequencing and heatmap of percentage of main bacteria family (at least 1 %) was generated.

The results are expressed as percentage of bacteria in individual samples with 3-4 mice per groups.

**Figure S4. Oral cholera toxin treatment alters the distribution of bacteria genus in the gut of IKK $\beta$ <sup>ΔIEC</sup> mice.** Control IKK $\beta$ -competent C57BL/6 mice and IKK $\beta$ <sup>ΔIEC</sup> mice were orally administered cholera toxin (10  $\mu$ g) by intragastric gavage and fecal pellets were collected before (day 0) and 2 and 4 days later. The composition of the bacterial community was analyzed by pyrosequencing and heatmap of percentage of main bacteria genus (at least 1 %) was generated. The results are expressed as percentage of bacteria in individual samples with 3-4 mice per groups.

**Figure S5. Oral cholera toxin treatment alters the distribution of bacteria species in the gut of IKK $\beta$ <sup>ΔIEC</sup> mice.** Control IKK $\beta$ -competent C57BL/6 mice and IKK $\beta$ <sup>ΔIEC</sup> mice were orally administered cholera toxin (10  $\mu$ g) by intragastric gavage and fecal pellets were collected before (day 0) and 2 and 4 days later. The composition of the bacterial community was analyzed by pyrosequencing and heatmap of percentage of the main bacteria species (at least 1 %) was generated. The results are expressed as percentage of bacteria in individual samples with 3-4 mice per groups.

**Figure S6. IKK $\beta$ -deficiency in myeloid cells also alters innate and adaptive immune responses to ingested allergen. (A) STAT3 responses in gut tissues after oral administration of cholera toxin. Control IKK $\beta$ -competent C57BL/6 mice, IKK $\beta$ <sup>ΔMye</sup> and IKK $\beta$ <sup>ΔIEC</sup> mice were**

orally administered cholera toxin (10  $\mu\text{g}$ ) by intragastric gavage. After 16 h, mice were euthanized and small intestines were collected, labeled with anti-pSTAT3 Ab and counter-stained with hematoxylin and eosin (Original magnification: x40). The figure is representative of at least three independent experiments. (B-C) Serum antibody responses. Control C57BL/6 (open bars),  $\text{IKK}\beta^{\Delta\text{Mye}}$  (grey bars) and  $\text{IKK}\beta^{\Delta\text{IEC}}$  (solid bars) mice were orally sensitized on days 0 and 7 with of OVA (1 mg) and cholera toxin (10  $\mu\text{g}$ ). Blood was collected on day 14 and OVA-specific Ab responses were analyzed by ELISA. The results are expressed as the mean  $\log_2$  titers  $\pm$  one SD and are from three separate experiments and four mice / group. (\*,  $p < 0.05$ ).

**Figure S7. Frequency of IgA secreting cells (ASC) in the lung and mesenteric lymph nodes of  $\text{IKK}\beta^{\Delta\text{IEC}}$  mice.** Mice were sensitized on days 0 and 7 by oral administration of ovalbumin (OVA, 1 mg) and cholera toxin (10  $\mu\text{g}$ ). Nasal challenges were performed on days 15, 16, and 19 and lungs and mesenteric lymph nodes (MLN) were collected on day 20 and subjected to an IgA-specific ELISPOT assay. The results are expressed as mean number of ASC/ $10^6$  cells  $\pm$  one SD and are from three experiments and four mice/group. (\*,  $p < 0.05$  compared to control C57BL/6 mice).

**Figure S8.  $\text{IKK}\beta$ -deficiency in intestinal epithelial cells alters serum and lung responses in mice sensitized by parenteral injection.** Control C57BL/6 (open bars), and  $\text{IKK}\beta^{\Delta\text{IEC}}$  (solid bars) mice were sensitized on days 0 and 7 by intraperitoneal injection of OVA (100  $\mu\text{g}$ ) and cholera toxin (1  $\mu\text{g}$ ). (A) Serum Ab responses. Blood was collected on day 14 and OVA-

specific Ab responses were analyzed by ELISA. The results are expressed as the mean  $\log_2$  titers  $\pm$  one SD and are from three separate experiments and four mice / group. (\*,  $p < 0.05$ ). (B) Mucus secretion in the lungs after antigen challenge. Nasal challenges were performed on days 15, 16, and 19 and animals were euthanized on day 20. Lung sections were stained with PAS and counter stained with hematoxylin and eosin. Pictures are representative of three separate experiments and four mice / group. Original magnifications are indicated.

**Figure S9. IKK $\beta$ -deficiency in intestinal epithelial cells alters immune cell recruitment and cytokine responses in the lungs of orally sensitized mice.** Mice were sensitized on days 0 and 7 by oral administration of ovalbumin (OVA, 1 mg) and cholera toxin (10  $\mu$ g). Nasal challenges were performed on days 15, 16, and 19. Flow cytometry analysis of the frequency of (A) F4/80<sup>+</sup>CD11c<sup>+</sup> alveolar macrophages, F4/80<sup>+</sup>CD11c<sup>-</sup> interstitial macrophages and F4/80<sup>-</sup>CD11<sup>+</sup> dendritic cells and (B) CD103<sup>+</sup> dendritic cells in the lungs after nasal antigen challenge of orally sensitized mice (C) Flow cytometry analysis of T cell subsets. Results are expressed as mean  $\pm$  SD of three separate experiments, with 4 mice per group. (\*,  $p < 0.05$  compared to control C57BL/6 mice).

**Figure S10. IKK $\beta$ -deficiency in intestinal epithelial cells alters airway cytokine responses to nasal antigen challenge of orally sensitized mice.** Mice were sensitized on days 0 and 7 by oral administration of ovalbumin (OVA, 1 mg) and cholera toxin (10  $\mu$ g). Nasal challenges were performed on days 15, 16, and 19. Bronchoalveolar lavage fluids (BAL) were collected on day 20 cytokine/chemokine responses were analyzed by conventional ELISA. Results are expressed

as mean  $\pm$  SD of three separate experiments, with 4 mice per group. (\*,  $p < 0.05$  compared to control C57BL/6 mice).



Bonnegarde et al.  
Supplemental Materials  
Figure S1.

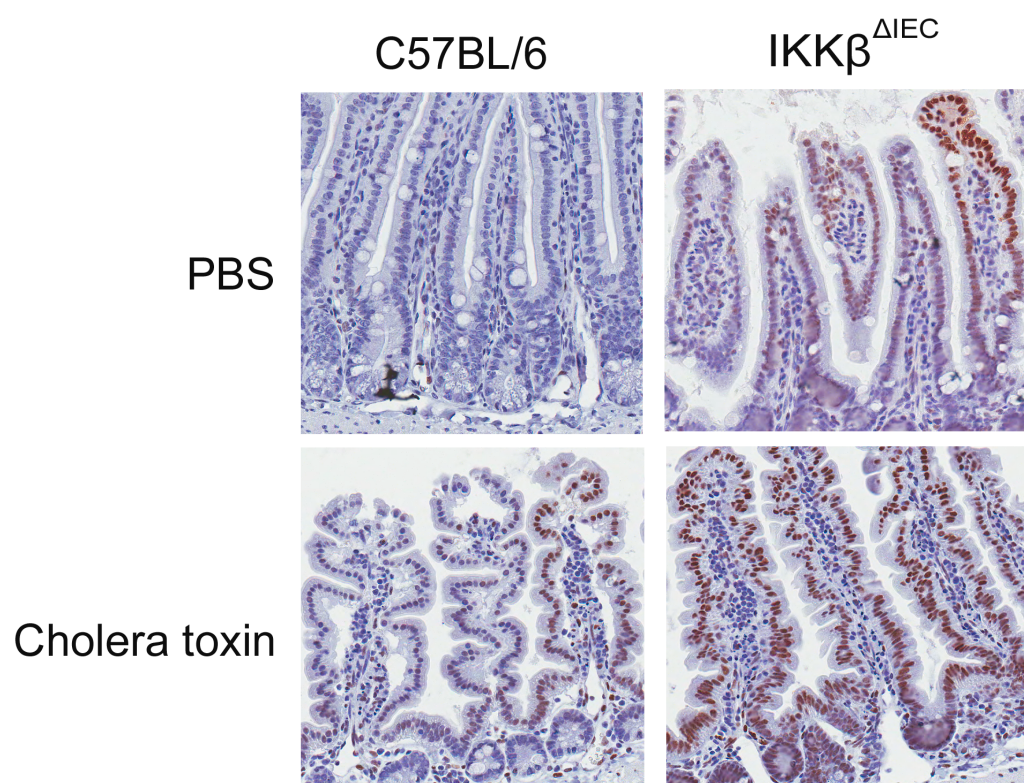

Bonnegarde et al.  
Supplemental Materials  
Figure S2.

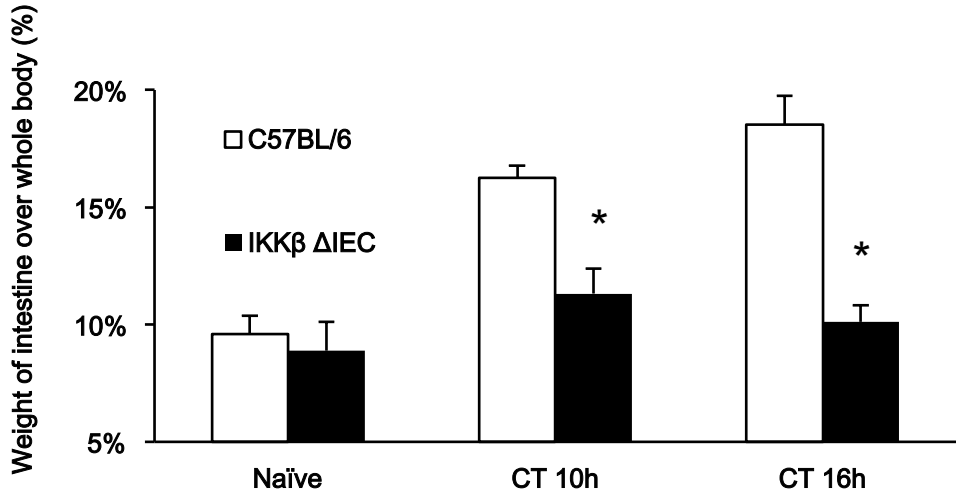

Bonnegarde et al.  
Supplemental Materials  
Figure S3.

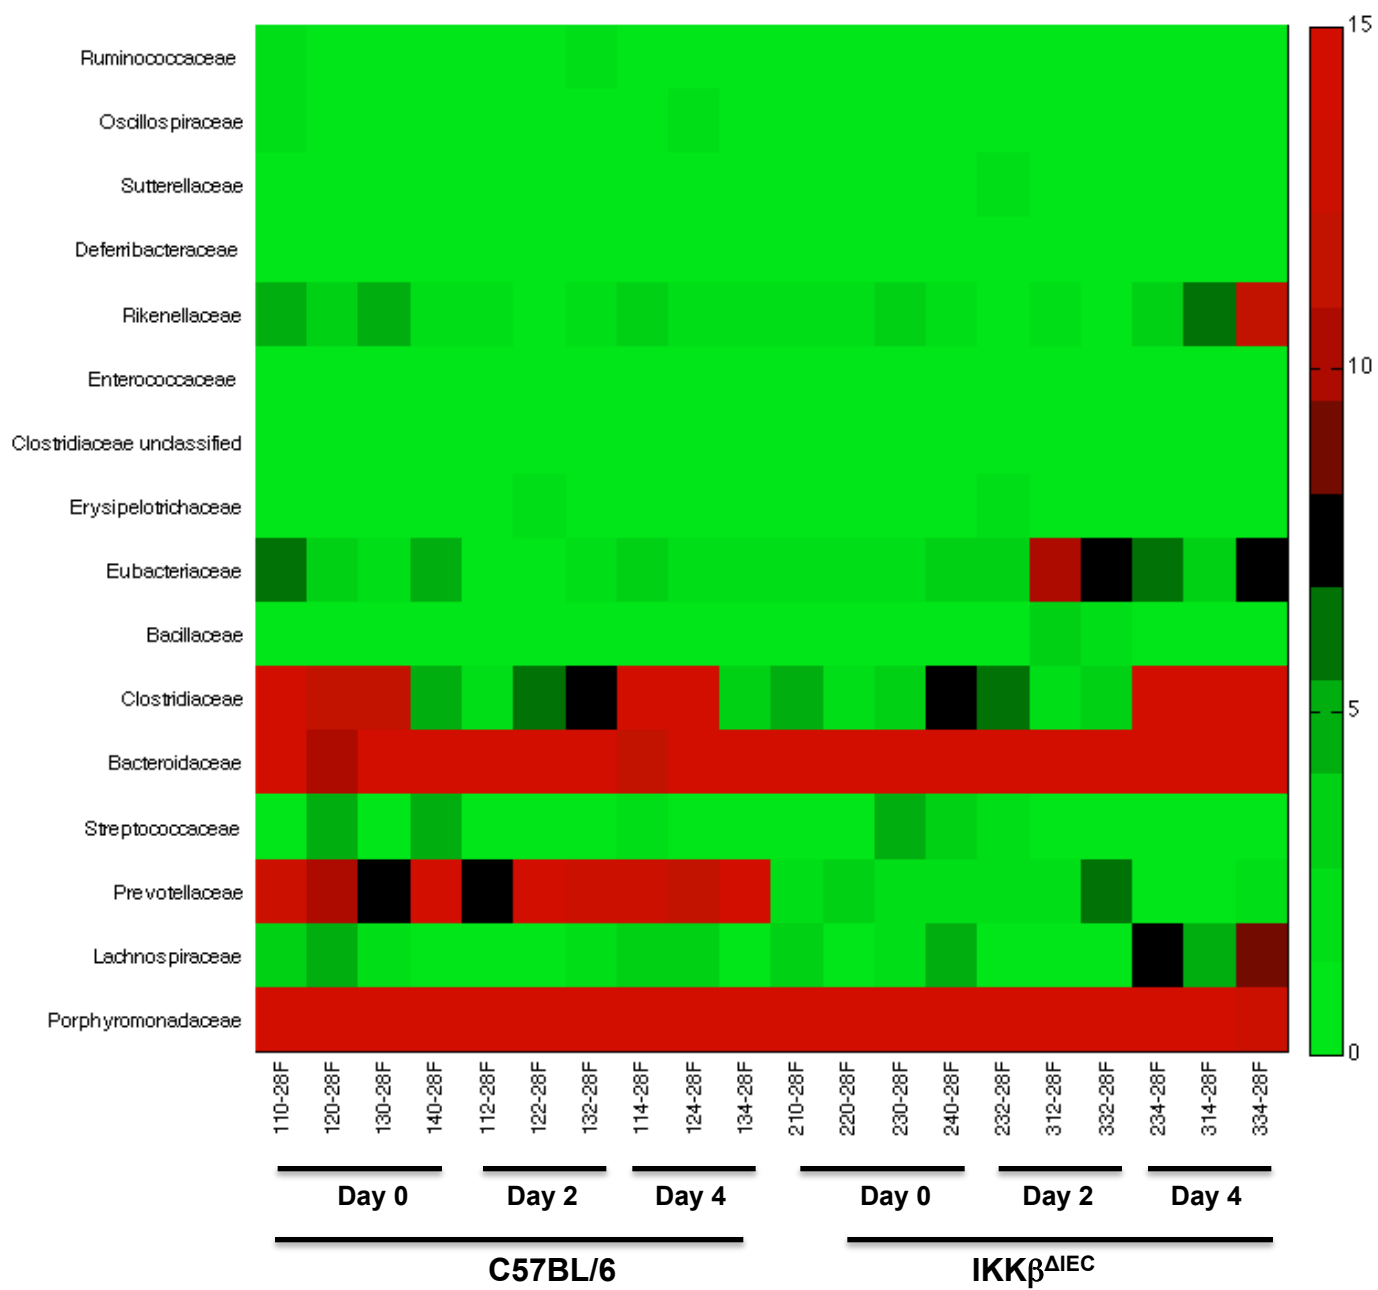



Bonnegarde et al.  
Supplemental Materials  
Figure S5.

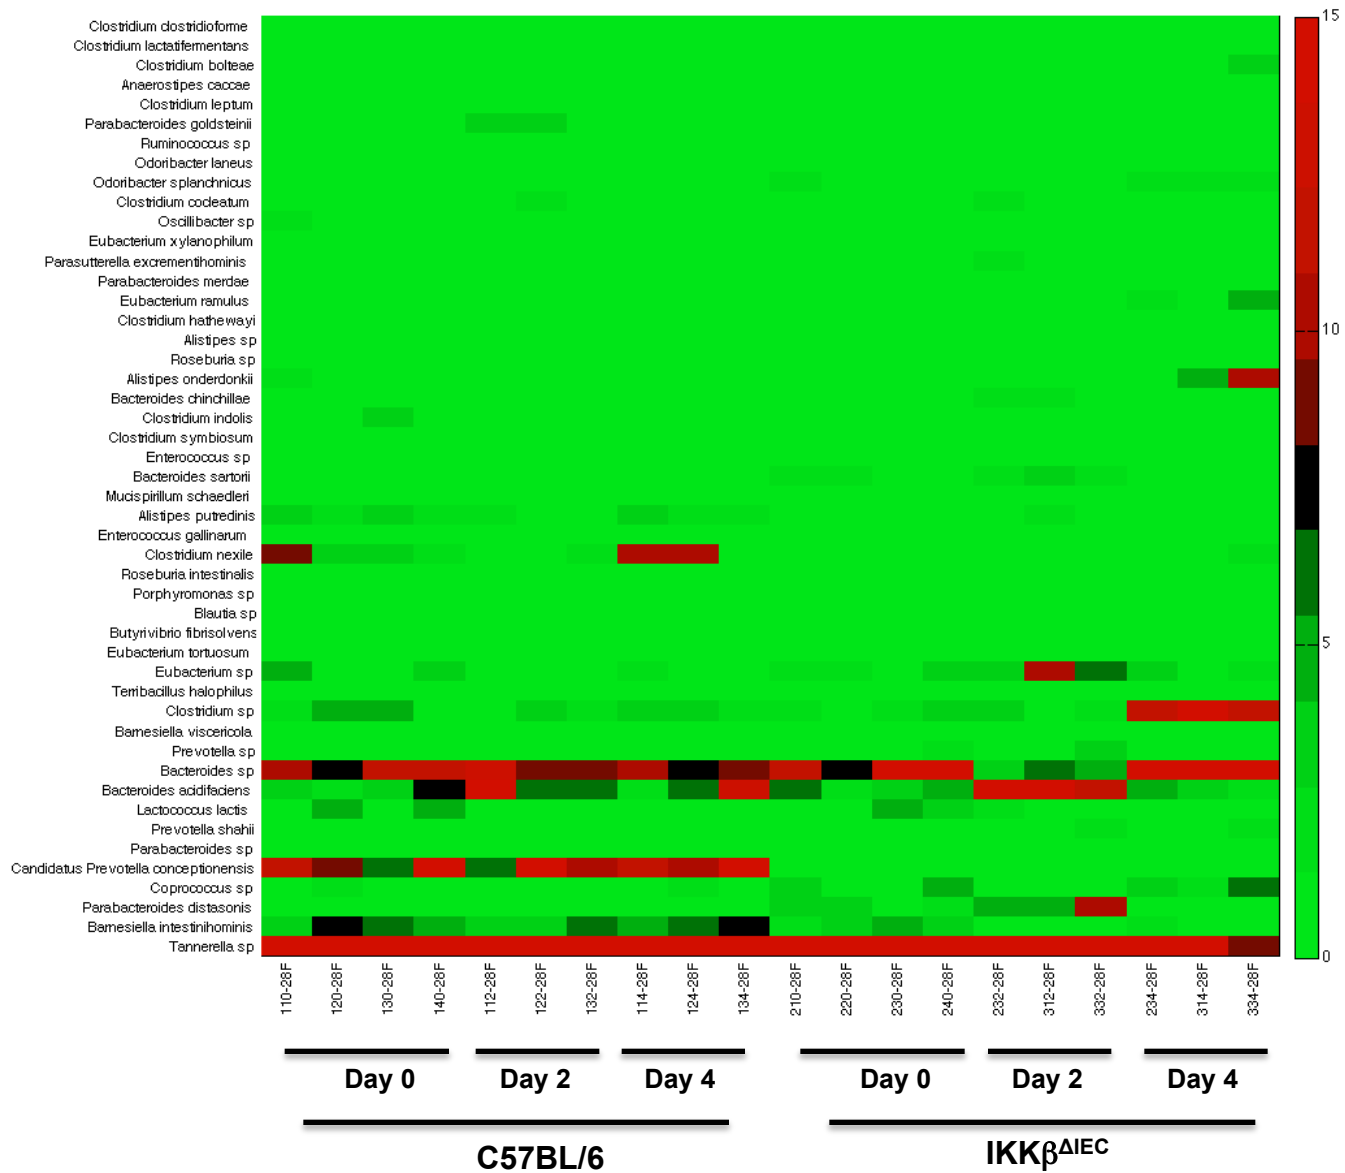

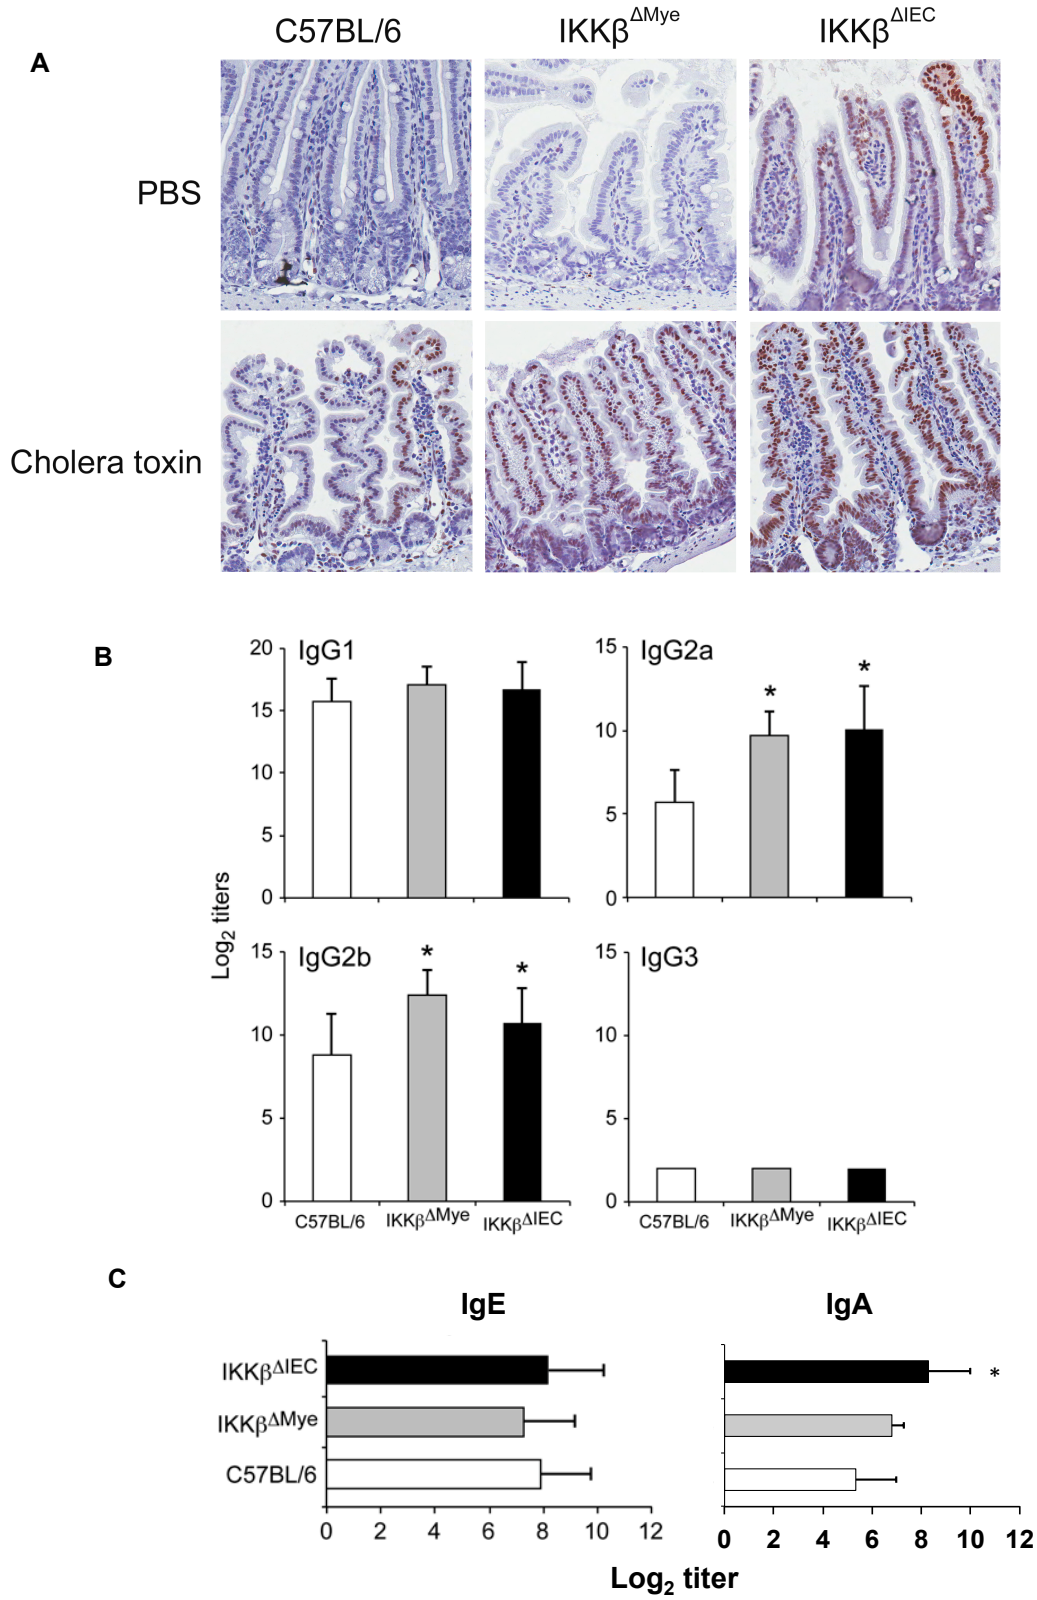

Bonnegarde et al.  
Supplemental Materials  
New Figure S7.

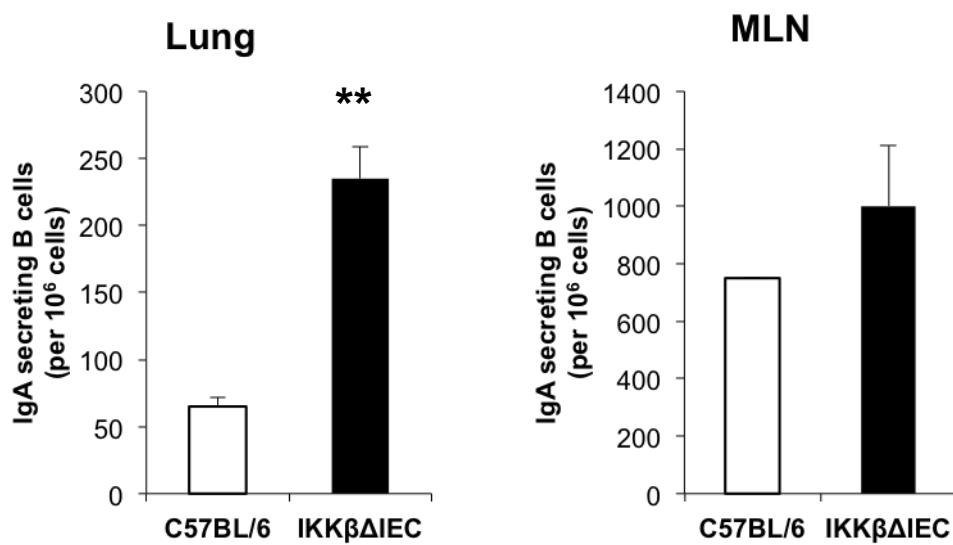

Bonnegarde et al.  
Supplemental Materials  
New Figure S8.

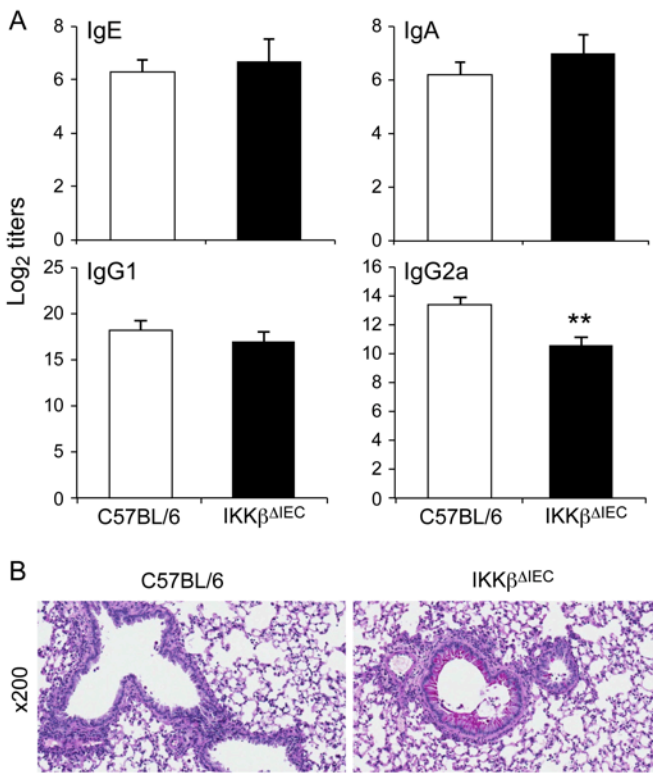



Bonnegarde et al.  
Supplemental Materials  
New Figure S9.

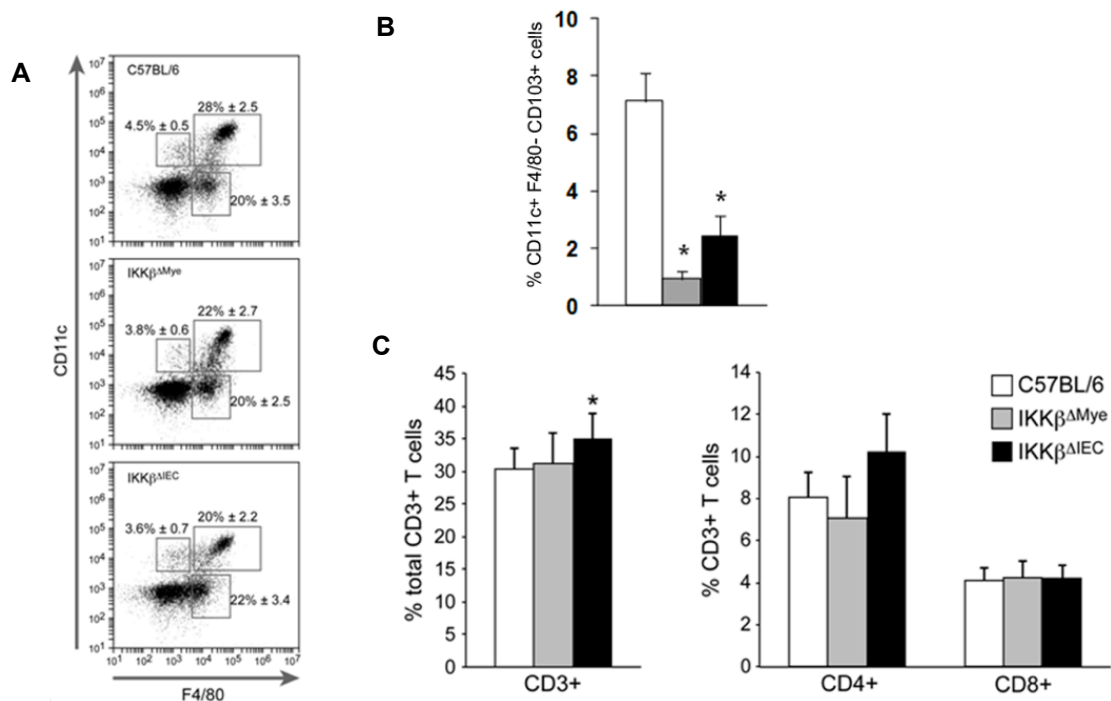

Bonnegarde et al.  
Supplemental Materials  
New Figure S10.

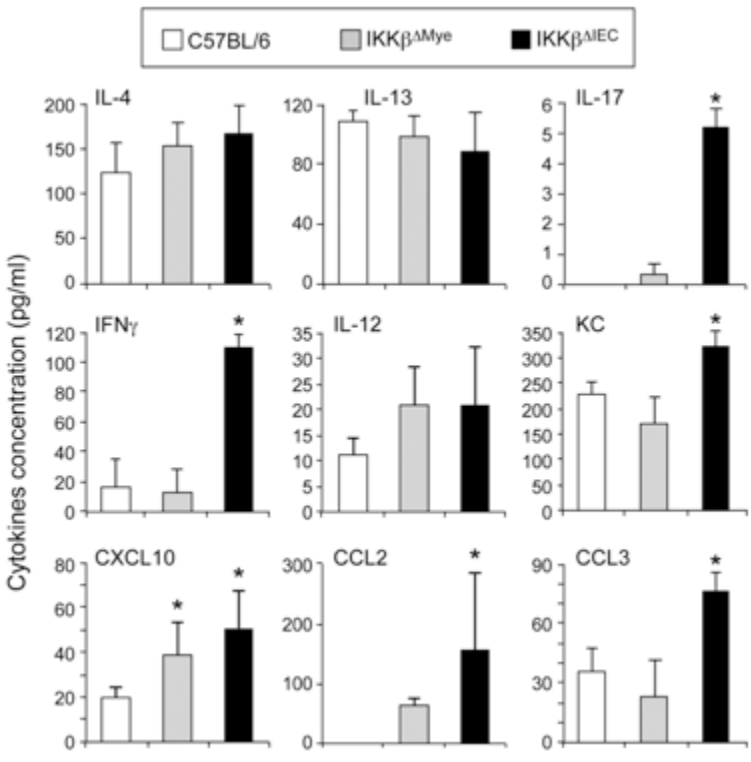

Table S1. Relative percentage of each Phylum

| Phylum          | C57BL/6 |      |       |      |       |       | IKK $\beta$ $\Delta$ IEC |      |       |      |       |      |
|-----------------|---------|------|-------|------|-------|-------|--------------------------|------|-------|------|-------|------|
|                 | Day 0   |      | Day 2 |      | Day 4 |       | Day 0                    |      | Day 2 |      | Day 4 |      |
|                 | Mean    | STD  | Mean  | STD  | Mean  | STD   | Mean                     | STD  | Mean  | STD  | Mean  | STD  |
| Bacteroidetes   | 76.78   | 7.17 | 82.32 | 3.55 | 75.80 | 7.62  | 82.68                    | 6.12 | 79.24 | 3.82 | 53.05 | 1.42 |
| Firmicutes      | 22.13   | 6.75 | 9.87  | 6.18 | 20.63 | 11.28 | 13.74                    | 5.75 | 15.75 | 2.19 | 40.99 | 1.29 |
| Deferribacteres | 0.30    | 0.25 | 0.05  | 0.02 | 0.30  | 0.27  | 0.03                     | 0.02 | 0.06  | 0.10 | 1.02  | 0.29 |
| Proteobacteria  | 0.30    | 0.11 | 6.40  | 7.70 | 2.51  | 3.93  | 2.38                     | 1.14 | 1.78  | 0.88 | 4.24  | 0.65 |
| Tenericutes     | 0.00    | 0.00 | 0.00  | 0.00 | 0.00  | 0.00  | 0.46                     | 0.44 | 0.13  | 0.18 | 0.20  | 0.10 |
| Actinobacteria  | 0.10    | 0.04 | 0.08  | 0.08 | 0.04  | 0.05  | 0.10                     | 0.07 | 0.42  | 0.37 | 0.04  | 0.04 |
| Verrucomicrobia | 0.08    | 0.10 | 1.09  | 1.54 | 0.15  | 0.13  | 0.00                     | 0.00 | 0.00  | 0.00 | 0.00  | 0.00 |
| Cyanobacteria   | 0.00    | 0.00 | 0.00  | 0.00 | 0.00  | 0.00  | 0.46                     | 0.26 | 2.07  | 2.74 | 0.22  | 0.22 |
| TM7             | 0.32    | 0.17 | 0.18  | 0.30 | 0.57  | 0.13  | 0.06                     | 0.01 | 0.00  | 0.00 | 0.24  | 0.15 |
| Spirochaetes    | 0.00    | 0.00 | 0.00  | 0.00 | 0.00  | 0.00  | 0.03                     | 0.03 | 0.49  | 0.54 | 0.00  | 0.00 |
| Acidobacteria   | 0.00    | 0.00 | 0.00  | 0.00 | 0.00  | 0.00  | 0.06                     | 0.07 | 0.05  | 0.09 | 0.01  | 0.01 |
| Chlorobi        | 0.00    | 0.00 | 0.00  | 0.00 | 0.00  | 0.00  | 0.00                     | 0.00 | 0.02  | 0.03 | 0.00  | 0.00 |
| Chloroflexi     | 0.00    | 0.00 | 0.00  | 0.00 | 0.00  | 0.00  | 0.00                     | 0.01 | 0.00  | 0.00 | 0.00  | 0.00 |

Blue: IKK $\beta$ <sup>AIEC</sup> mice different than control C57B/L 6 group at day 0.

Red: Decreased percentage in IKK $\beta$ <sup>AIEC</sup> mice compared to same group at day 0.

Green: Increased percentage in IKK $\beta$ <sup>AIEC</sup> mice compared to same group at day 0.

**Table S2. Relative percentage of bacteria classes**

| Class                   | C57BL/6 |      |       |      |       |       | IKK $\beta$ $\Delta$ IEC |      |       |      |       |      |
|-------------------------|---------|------|-------|------|-------|-------|--------------------------|------|-------|------|-------|------|
|                         | Day 0   |      | Day 2 |      | Day 4 |       | Day 0                    |      | Day 2 |      | Day 4 |      |
|                         | Mean    | STD  | Mean  | STD  | Mean  | STD   | Mean                     | STD  | Mean  | STD  | Mean  | STD  |
| Bacteroidia             | 76.39   | 6.15 | 81.76 | 3.61 | 75.38 | 7.88  | 82.32                    | 4.67 | 78.59 | 3.41 | 52.91 | 1.48 |
| Clostridia              | 19.06   | 5.77 | 8.28  | 5.34 | 19.17 | 10.36 | 10.86                    | 2.47 | 12.30 | 0.50 | 39.40 | 1.76 |
| Bacilli                 | 3.04    | 2.19 | 0.75  | 0.54 | 1.10  | 1.12  | 2.68                     | 3.18 | 2.69  | 0.93 | 1.49  | 0.40 |
| Erysipelotrichi         | 0.03    | 0.06 | 0.85  | 1.03 | 0.37  | 0.21  | 0.19                     | 0.14 | 0.76  | 1.10 | 0.10  | 0.12 |
| Deferribacteres (class) | 0.30    | 0.21 | 0.05  | 0.02 | 0.30  | 0.27  | 0.03                     | 0.03 | 0.06  | 0.10 | 1.02  | 0.29 |
| Betaproteobacteria      | 0.04    | 0.02 | 0.19  | 0.16 | 0.06  | 0.06  | 0.59                     | 0.42 | 0.63  | 0.87 | 0.32  | 0.13 |
| Alphaproteobacteria     | 0.23    | 0.15 | 6.20  | 7.72 | 2.33  | 3.93  | 0.17                     | 0.02 | 0.69  | 0.88 | 0.26  | 0.31 |
| Mollicutes              | 0.00    | 0.00 | 0.00  | 0.00 | 0.00  | 0.00  | 0.46                     | 0.05 | 0.13  | 0.18 | 0.20  | 0.10 |
| Deltaproteobacteria     | 0.02    | 0.02 | 0.01  | 0.01 | 0.12  | 0.06  | 0.15                     | 0.34 | 0.01  | 0.01 | 0.13  | 0.15 |
| Actinobacteria (class)  | 0.10    | 0.04 | 0.08  | 0.08 | 0.04  | 0.05  | 0.10                     | 0.09 | 0.42  | 0.37 | 0.04  | 0.04 |
| Verrucomicrobiae        | 0.08    | 0.13 | 1.09  | 1.54 | 0.15  | 0.13  | 0.00                     | 0.00 | 0.00  | 0.00 | 0.00  | 0.00 |
| Cyanobacteria (class)   | 0.00    | 0.00 | 0.00  | 0.00 | 0.00  | 0.00  | 0.04                     | 0.03 | 0.18  | 0.26 | 0.18  | 0.20 |
| Chroococcales           | 0.00    | 0.00 | 0.00  | 0.00 | 0.00  | 0.00  | 0.42                     | 0.22 | 1.88  | 2.48 | 0.04  | 0.04 |
| Epsilonproteobacteria   | 0.00    | 0.00 | 0.00  | 0.00 | 0.00  | 0.00  | 1.30                     | 1.36 | 0.32  | 0.30 | 3.47  | 0.76 |
| TM7 (class)             | 0.32    | 0.16 | 0.18  | 0.30 | 0.57  | 0.13  | 0.06                     | 0.01 | 0.00  | 0.00 | 0.24  | 0.15 |
| Spirochaetia            | 0.00    | 0.00 | 0.00  | 0.00 | 0.00  | 0.00  | 0.03                     | 0.04 | 0.49  | 0.54 | 0.00  | 0.00 |
| Flavobacteria           | 0.34    | 0.20 | 0.55  | 0.25 | 0.42  | 0.31  | 0.35                     | 0.15 | 0.65  | 0.41 | 0.12  | 0.11 |
| Gammaproteobacteria     | 0.00    | 0.00 | 0.00  | 0.00 | 0.01  | 0.01  | 0.16                     | 0.11 | 0.13  | 0.13 | 0.06  | 0.05 |
| Sphingobacteria         | 0.04    | 0.04 | 0.00  | 0.00 | 0.00  | 0.00  | 0.00                     | 0.00 | 0.00  | 0.00 | 0.00  | 0.00 |
| Cytophagia              | 0.00    | 0.00 | 0.01  | 0.02 | 0.00  | 0.00  | 0.00                     | 0.00 | 0.00  | 0.00 | 0.01  | 0.02 |
| Acidobacteria (class)   | 0.00    | 0.00 | 0.00  | 0.00 | 0.00  | 0.00  | 0.06                     | 0.07 | 0.05  | 0.09 | 0.01  | 0.01 |
| Chlorobia               | 0.00    | 0.00 | 0.00  | 0.00 | 0.00  | 0.00  | 0.00                     | 0.00 | 0.02  | 0.03 | 0.00  | 0.00 |
| Anaerolineae            | 0.00    | 0.00 | 0.00  | 0.00 | 0.00  | 0.00  | 0.00                     | 0.01 | 0.00  | 0.00 | 0.00  | 0.00 |

Blue: IKK $\beta$  <sup>$\Delta$ IEC</sup> mice different than control C57B/L 6 group at day 0.

Red: Decreased percentage in IKK $\beta$  <sup>$\Delta$ IEC</sup> mice compared to same group at day 0.

Green: Increased percentage in IKK $\beta$  <sup>$\Delta$ IEC</sup> mice compared to same group at day 0.

| Order               | C57BL/6 |      |       |      |       |       | IKK $\beta$ $\Delta$ IEC |      |       |      |       |      |
|---------------------|---------|------|-------|------|-------|-------|--------------------------|------|-------|------|-------|------|
|                     | Day 0   |      | Day 2 |      | Day 4 |       | Day 0                    |      | Day 2 |      | Day 4 |      |
|                     | Mean    | STD  | Mean  | STD  | Mean  | STD   | Mean                     | STD  | Mean  | STD  | Mean  | STD  |
| Bacteroidales       | 76.16   | 7.09 | 81.59 | 3.69 | 75.27 | 7.84  | 82.31                    | 6.10 | 78.54 | 3.44 | 52.90 | 1.47 |
| Clostridiales       | 19.06   | 7.46 | 8.28  | 5.34 | 19.17 | 10.36 | 10.86                    | 4.44 | 12.30 | 0.50 | 39.40 | 1.76 |
| Lactobacillales     | 3.00    | 2.05 | 0.65  | 0.53 | 1.07  | 1.14  | 2.56                     | 2.75 | 1.01  | 1.63 | 1.08  | 0.44 |
| Bacillales          | 0.04    | 0.04 | 0.10  | 0.09 | 0.03  | 0.04  | 0.13                     | 0.09 | 1.68  | 1.33 | 0.41  | 0.41 |
| Erysipelotrichales  | 0.03    | 0.05 | 0.85  | 1.03 | 0.37  | 0.21  | 0.19                     | 0.14 | 0.76  | 1.10 | 0.10  | 0.12 |
| Deferribacterales   | 0.30    | 0.25 | 0.05  | 0.02 | 0.30  | 0.27  | 0.03                     | 0.02 | 0.06  | 0.10 | 1.02  | 0.29 |
| Burkholderiales     | 0.04    | 0.02 | 0.19  | 0.16 | 0.06  | 0.06  | 0.59                     | 0.56 | 0.63  | 0.87 | 0.32  | 0.13 |
| Rhodospirillales    | 0.23    | 0.12 | 6.15  | 7.70 | 2.31  | 3.90  | 0.01                     | 0.03 | 0.01  | 0.02 | 0.00  | 0.00 |
| Mycoplasmatales     | 0.00    | 0.00 | 0.00  | 0.00 | 0.00  | 0.00  | 0.14                     | 0.12 | 0.10  | 0.18 | 0.12  | 0.11 |
| Desulfovibrionales  | 0.01    | 0.02 | 0.00  | 0.00 | 0.05  | 0.08  | 0.15                     | 0.30 | 0.00  | 0.00 | 0.11  | 0.16 |
| Coriobacteriales    | 0.07    | 0.04 | 0.05  | 0.03 | 0.02  | 0.02  | 0.04                     | 0.02 | 0.02  | 0.02 | 0.04  | 0.04 |
| Anaeroplasmatales   | 0.00    | 0.00 | 0.00  | 0.00 | 0.00  | 0.00  | 0.30                     | 0.32 | 0.02  | 0.01 | 0.06  | 0.07 |
| Verrucomicrobiales  | 0.08    | 0.10 | 1.09  | 1.54 | 0.15  | 0.13  | 0.00                     | 0.00 | 0.00  | 0.00 | 0.00  | 0.00 |
| Rickettsiales       | 0.00    | 0.00 | 0.00  | 0.00 | 0.00  | 0.00  | 0.01                     | 0.01 | 0.04  | 0.06 | 0.24  | 0.29 |
| Actinomycetales     | 0.03    | 0.01 | 0.03  | 0.05 | 0.02  | 0.03  | 0.06                     | 0.05 | 0.40  | 0.39 | 0.00  | 0.00 |
| Chroococcales       | 0.00    | 0.00 | 0.00  | 0.00 | 0.00  | 0.00  | 0.03                     | 0.04 | 0.18  | 0.26 | 0.00  | 0.00 |
| Cyanobium (order)   | 0.00    | 0.00 | 0.00  | 0.00 | 0.00  | 0.00  | 0.42                     | 0.26 | 1.88  | 2.48 | 0.04  | 0.04 |
| Caulobacterales     | 0.00    | 0.00 | 0.01  | 0.01 | 0.00  | 0.00  | 0.12                     | 0.04 | 0.41  | 0.55 | 0.02  | 0.02 |
| Kiloniellales       | 0.00    | 0.00 | 0.01  | 0.02 | 0.00  | 0.00  | 0.01                     | 0.02 | 0.13  | 0.20 | 0.00  | 0.00 |
| Rhizobiales         | 0.00    | 0.00 | 0.04  | 0.03 | 0.02  | 0.03  | 0.00                     | 0.00 | 0.01  | 0.01 | 0.00  | 0.00 |
| Campylobacteriales  | 0.00    | 0.00 | 0.00  | 0.00 | 0.00  | 0.00  | 1.30                     | 1.22 | 0.32  | 0.30 | 3.47  | 0.76 |
| TM7 (order)         | 0.32    | 0.17 | 0.18  | 0.30 | 0.57  | 0.13  | 0.06                     | 0.01 | 0.00  | 0.00 | 0.24  | 0.15 |
| Bacteroidia (order) | 0.23    | 0.12 | 0.17  | 0.09 | 0.11  | 0.05  | 0.02                     | 0.04 | 0.04  | 0.05 | 0.01  | 0.02 |
| Spirochaetales      | 0.00    | 0.00 | 0.00  | 0.00 | 0.00  | 0.00  | 0.03                     | 0.03 | 0.49  | 0.54 | 0.00  | 0.00 |
| Flavobacteriales    | 0.34    | 0.17 | 0.55  | 0.25 | 0.42  | 0.31  | 0.35                     | 0.14 | 0.65  | 0.41 | 0.12  | 0.11 |
| Pasteurellales      | 0.00    | 0.00 | 0.00  | 0.00 | 0.01  | 0.01  | 0.00                     | 0.00 | 0.00  | 0.00 | 0.00  | 0.00 |
| Bdellovibrionales   | 0.01    | 0.02 | 0.00  | 0.00 | 0.05  | 0.06  | 0.00                     | 0.00 | 0.00  | 0.00 | 0.00  | 0.00 |
| Pseudomonadales     | 0.00    | 0.00 | 0.00  | 0.00 | 0.00  | 0.00  | 0.04                     | 0.04 | 0.00  | 0.00 | 0.01  | 0.01 |
| Acholeplasmatales   | 0.00    | 0.00 | 0.00  | 0.00 | 0.00  | 0.00  | 0.01                     | 0.02 | 0.00  | 0.00 | 0.00  | 0.00 |
| Enterobacteriales   | 0.00    | 0.00 | 0.00  | 0.00 | 0.00  | 0.00  | 0.00                     | 0.00 | 0.05  | 0.05 | 0.05  | 0.04 |
| Sphingobacteriales  | 0.04    | 0.03 | 0.00  | 0.00 | 0.00  | 0.00  | 0.00                     | 0.00 | 0.00  | 0.00 | 0.00  | 0.00 |
| Cytophagales        | 0.00    | 0.00 | 0.01  | 0.02 | 0.00  | 0.00  | 0.00                     | 0.00 | 0.00  | 0.00 | 0.01  | 0.02 |
| Desulfuromonadales  | 0.00    | 0.00 | 0.01  | 0.01 | 0.02  | 0.00  | 0.00                     | 0.01 | 0.01  | 0.01 | 0.01  | 0.02 |
| Mollicutes (order)  | 0.00    | 0.00 | 0.00  | 0.00 | 0.00  | 0.00  | 0.01                     | 0.02 | 0.00  | 0.00 | 0.00  | 0.00 |
| Nostocales          | 0.00    | 0.00 | 0.00  | 0.00 | 0.00  | 0.00  | 0.00                     | 0.01 | 0.00  | 0.00 | 0.18  | 0.20 |
| Kopriimonadales     | 0.00    | 0.00 | 0.00  | 0.00 | 0.00  | 0.00  | 0.02                     | 0.03 | 0.09  | 0.08 | 0.00  | 0.00 |
| Methylococcales     | 0.00    | 0.00 | 0.00  | 0.00 | 0.00  | 0.00  | 0.12                     | 0.13 | 0.08  | 0.09 | 0.00  | 0.00 |
| Acidobacteriales    | 0.00    | 0.00 | 0.00  | 0.00 | 0.00  | 0.00  | 0.06                     | 0.07 | 0.05  | 0.09 | 0.01  | 0.01 |
| Thiotrichales       | 0.00    | 0.00 | 0.00  | 0.00 | 0.00  | 0.00  | 0.00                     | 0.01 | 0.00  | 0.00 | 0.00  | 0.00 |
| Chlorobiales        | 0.00    | 0.00 | 0.00  | 0.00 | 0.00  | 0.00  | 0.00                     | 0.00 | 0.02  | 0.03 | 0.00  | 0.00 |
| Anaerolineales      | 0.00    | 0.00 | 0.00  | 0.00 | 0.00  | 0.00  | 0.00                     | 0.01 | 0.00  | 0.00 | 0.00  | 0.00 |
| Entomoplasmatales   | 0.00    | 0.00 | 0.00  | 0.00 | 0.00  | 0.00  | 0.00                     | 0.01 | 0.00  | 0.00 | 0.01  | 0.02 |

Blue: IKK $\beta$  $\Delta$ IEC mice different than control C57B/L 6 group at day 0.

Red: Decreased percentage in IKK $\beta$  $\Delta$ IEC mice compared to same group at day 0.

Green: Increased percentage in IKK $\beta$  $\Delta$ IEC mice compared to same group at day 0.

Page 5 of 84. **Table S4. Relative percentage of bacteria families**

| Family                      | C57BL/6 |      |       |      |       |      | IKK $\beta$ $\Delta$ IEC |      |       |      |       |      |
|-----------------------------|---------|------|-------|------|-------|------|--------------------------|------|-------|------|-------|------|
|                             | Day 0   |      | Day 2 |      | Day 4 |      | Day 0                    |      | Day 2 |      | Day 4 |      |
|                             | Mean    | STD  | Mean  | STD  | Mean  | STD  | Mean                     | STD  | Mean  | STD  | Mean  | STD  |
| Porphyromonadaceae          | 45.65   | 7.34 | 44.05 | 6.79 | 39.38 | 4.92 | 59.03                    | 8.60 | 49.04 | 5.05 | 17.67 | 4.64 |
| Lachnospiraceae             | 2.41    | 1.56 | 0.88  | 0.83 | 2.50  | 1.45 | 2.82                     | 1.37 | 0.49  | 0.11 | 6.84  | 2.02 |
| Prevotellaceae              | 11.51   | 3.83 | 15.41 | 9.68 | 16.49 | 7.65 | 2.42                     | 0.36 | 3.18  | 2.20 | 0.92  | 0.52 |
| Streptococcaceae            | 2.99    | 2.07 | 0.46  | 0.43 | 0.71  | 0.63 | 2.30                     | 2.51 | 0.77  | 1.30 | 0.41  | 0.28 |
| Bacteroidaceae              | 14.96   | 3.88 | 20.39 | 7.87 | 16.65 | 5.79 | 18.65                    | 2.82 | 25.08 | 3.81 | 27.60 | 3.95 |
| Clostridiaceae              | 10.56   | 4.56 | 5.03  | 2.81 | 12.16 | 7.19 | 4.81                     | 2.46 | 3.90  | 2.45 | 25.34 | 6.23 |
| Bacillaceae                 | 0.01    | 0.02 | 0.07  | 0.07 | 0.00  | 0.00 | 0.09                     | 0.07 | 1.64  | 1.35 | 0.18  | 0.06 |
| Eubacteriaceae              | 3.81    | 1.78 | 0.75  | 0.64 | 2.59  | 1.36 | 2.54                     | 0.50 | 6.61  | 3.21 | 5.35  | 2.48 |
| Erysipelotrichaceae         | 0.03    | 0.05 | 0.85  | 1.03 | 0.37  | 0.21 | 0.19                     | 0.14 | 0.76  | 1.10 | 0.10  | 0.12 |
| Clostridiaceae unclassified | 0.25    | 0.14 | 0.07  | 0.10 | 0.05  | 0.03 | 0.14                     | 0.11 | 0.31  | 0.23 | 0.20  | 0.13 |
| Enterococcaceae             | 0.00    | 0.00 | 0.06  | 0.05 | 0.01  | 0.02 | 0.01                     | 0.02 | 0.03  | 0.04 | 0.00  | 0.00 |
| Rikenellaceae               | 4.03    | 1.42 | 1.72  | 0.55 | 2.75  | 0.81 | 2.15                     | 0.44 | 1.24  | 0.51 | 6.68  | 4.33 |
| Deferribacteraceae          | 0.30    | 0.25 | 0.05  | 0.02 | 0.30  | 0.27 | 0.03                     | 0.02 | 0.06  | 0.10 | 1.02  | 0.29 |
| Sutterellaceae              | 0.04    | 0.02 | 0.19  | 0.16 | 0.05  | 0.05 | 0.59                     | 0.56 | 0.63  | 0.87 | 0.32  | 0.13 |
| Oscillospiraceae            | 1.10    | 0.72 | 0.59  | 0.50 | 0.98  | 0.46 | 0.16                     | 0.15 | 0.36  | 0.23 | 0.48  | 0.07 |
| Ruminococcaceae             | 0.78    | 0.50 | 0.87  | 0.71 | 0.82  | 0.41 | 0.32                     | 0.13 | 0.37  | 0.21 | 1.07  | 0.24 |
| Rhodospirillaceae           | 0.23    | 0.12 | 6.13  | 7.68 | 2.31  | 3.89 | 0.01                     | 0.03 | 0.01  | 0.02 | 0.00  | 0.00 |
| Mycoplasmataceae            | 0.00    | 0.00 | 0.00  | 0.00 | 0.00  | 0.00 | 0.14                     | 0.12 | 0.10  | 0.18 | 0.12  | 0.11 |
| Desulfovibrionaceae         | 0.01    | 0.02 | 0.00  | 0.00 | 0.05  | 0.08 | 0.15                     | 0.30 | 0.00  | 0.00 | 0.11  | 0.16 |
| Paenibacillaceae            | 0.01    | 0.01 | 0.03  | 0.05 | 0.03  | 0.04 | 0.01                     | 0.02 | 0.03  | 0.03 | 0.02  | 0.00 |
| Planococcaceae              | 0.01    | 0.02 | 0.00  | 0.00 | 0.00  | 0.00 | 0.00                     | 0.00 | 0.00  | 0.00 | 0.18  | 0.32 |
| Marinilabiaceae             | 0.02    | 0.02 | 0.01  | 0.01 | 0.00  | 0.00 | 0.05                     | 0.03 | 0.01  | 0.02 | 0.03  | 0.03 |
| Lactobacillaceae            | 0.02    | 0.03 | 0.14  | 0.14 | 0.34  | 0.53 | 0.25                     | 0.25 | 0.22  | 0.35 | 0.68  | 0.16 |
| Coriobacteriaceae           | 0.07    | 0.04 | 0.05  | 0.03 | 0.02  | 0.02 | 0.04                     | 0.02 | 0.02  | 0.02 | 0.04  | 0.04 |
| Anaeroplasmataceae          | 0.00    | 0.00 | 0.00  | 0.00 | 0.00  | 0.00 | 0.30                     | 0.32 | 0.02  | 0.01 | 0.06  | 0.07 |
| Verrucomicrobiaceae         | 0.08    | 0.10 | 1.09  | 1.54 | 0.15  | 0.13 | 0.00                     | 0.00 | 0.00  | 0.00 | 0.00  | 0.00 |
| Rickettsiaceae              | 0.00    | 0.00 | 0.00  | 0.00 | 0.00  | 0.00 | 0.01                     | 0.01 | 0.04  | 0.06 | 0.24  | 0.29 |
| Nocardiaceae                | 0.00    | 0.00 | 0.00  | 0.00 | 0.00  | 0.00 | 0.04                     | 0.04 | 0.20  | 0.19 | 0.00  | 0.00 |
| Chroococcaceae unclassified | 0.00    | 0.00 | 0.00  | 0.00 | 0.00  | 0.00 | 0.03                     | 0.04 | 0.18  | 0.26 | 0.00  | 0.00 |
| Cyanobium (family)          | 0.00    | 0.00 | 0.00  | 0.00 | 0.00  | 0.00 | 0.42                     | 0.26 | 1.88  | 2.48 | 0.04  | 0.04 |
| Caulobacteraceae            | 0.00    | 0.00 | 0.01  | 0.01 | 0.00  | 0.00 | 0.12                     | 0.04 | 0.41  | 0.55 | 0.02  | 0.02 |
| Kiloniellaceae              | 0.00    | 0.00 | 0.01  | 0.02 | 0.00  | 0.00 | 0.01                     | 0.02 | 0.13  | 0.20 | 0.00  | 0.00 |
| Hypomicrobiaceae            | 0.00    | 0.00 | 0.03  | 0.03 | 0.02  | 0.03 | 0.00                     | 0.00 | 0.00  | 0.00 | 0.00  | 0.00 |
| Helicobacteraceae           | 0.00    | 0.00 | 0.00  | 0.00 | 0.00  | 0.00 | 1.30                     | 1.22 | 0.32  | 0.30 | 3.47  | 0.76 |
| TM7 (family)                | 0.32    | 0.17 | 0.18  | 0.30 | 0.57  | 0.13 | 0.06                     | 0.01 | 0.00  | 0.00 | 0.24  | 0.15 |
| Peptococcaceae              | 0.14    | 0.06 | 0.05  | 0.05 | 0.08  | 0.05 | 0.06                     | 0.05 | 0.26  | 0.40 | 0.12  | 0.08 |
| Bacteroidia (family)        | 0.23    | 0.12 | 0.17  | 0.09 | 0.11  | 0.05 | 0.02                     | 0.04 | 0.04  | 0.05 | 0.01  | 0.02 |
| Spirochaetaceae             | 0.00    | 0.00 | 0.00  | 0.00 | 0.00  | 0.00 | 0.03                     | 0.03 | 0.49  | 0.54 | 0.00  | 0.00 |
| Bacillaceae unclassified    | 0.00    | 0.00 | 0.00  | 0.00 | 0.00  | 0.00 | 0.02                     | 0.03 | 0.00  | 0.00 | 0.02  | 0.04 |
| Flavobacteriaceae           | 0.34    | 0.17 | 0.55  | 0.25 | 0.42  | 0.31 | 0.35                     | 0.14 | 0.65  | 0.41 | 0.12  | 0.11 |
| Pasteurellaceae             | 0.00    | 0.00 | 0.00  | 0.00 | 0.01  | 0.01 | 0.00                     | 0.00 | 0.00  | 0.00 | 0.00  | 0.00 |
| Bacteriovoracaceae          | 0.01    | 0.02 | 0.00  | 0.00 | 0.05  | 0.06 | 0.00                     | 0.00 | 0.00  | 0.00 | 0.00  | 0.00 |
| Pseudomonadaceae            | 0.00    | 0.00 | 0.00  | 0.00 | 0.00  | 0.00 | 0.04                     | 0.04 | 0.00  | 0.00 | 0.01  | 0.01 |
| Acholeplasmataceae          | 0.00    | 0.00 | 0.00  | 0.00 | 0.00  | 0.00 | 0.01                     | 0.02 | 0.00  | 0.00 | 0.00  | 0.00 |
| Enterobacteriaceae          | 0.00    | 0.00 | 0.00  | 0.00 | 0.00  | 0.00 | 0.00                     | 0.00 | 0.05  | 0.05 | 0.05  | 0.04 |
| Streptomycetaceae           | 0.03    | 0.01 | 0.03  | 0.05 | 0.02  | 0.03 | 0.00                     | 0.01 | 0.00  | 0.00 | 0.00  | 0.00 |
| Chitinophagaceae            | 0.01    | 0.02 | 0.00  | 0.00 | 0.00  | 0.00 | 0.00                     | 0.00 | 0.00  | 0.00 | 0.00  | 0.00 |
| Cytophagaceae               | 0.00    | 0.00 | 0.01  | 0.02 | 0.00  | 0.00 | 0.00                     | 0.00 | 0.00  | 0.00 | 0.01  | 0.02 |
| Desulfuromonadaceae         | 0.00    | 0.00 | 0.01  | 0.01 | 0.02  | 0.00 | 0.00                     | 0.01 | 0.01  | 0.01 | 0.00  | 0.00 |
| Sphingobacteriaceae         | 0.03    | 0.03 | 0.00  | 0.00 | 0.00  | 0.00 | 0.00                     | 0.00 | 0.00  | 0.00 | 0.00  | 0.00 |
| Acetobacteraceae            | 0.00    | 0.00 | 0.01  | 0.02 | 0.01  | 0.01 | 0.00                     | 0.00 | 0.00  | 0.00 | 0.00  | 0.00 |
| Comamonadaceae              | 0.00    | 0.00 | 0.00  | 0.00 | 0.01  | 0.01 | 0.00                     | 0.00 | 0.00  | 0.00 | 0.00  | 0.00 |
| Mollicutes (family)         | 0.00    | 0.00 | 0.00  | 0.00 | 0.00  | 0.00 | 0.01                     | 0.02 | 0.00  | 0.00 | 0.00  | 0.00 |
| Nostocaceae                 | 0.00    | 0.00 | 0.00  | 0.00 | 0.00  | 0.00 | 0.00                     | 0.01 | 0.00  | 0.00 | 0.18  | 0.20 |
| Micromonosporaceae          | 0.00    | 0.00 | 0.00  | 0.00 | 0.00  | 0.00 | 0.00                     | 0.01 | 0.20  | 0.31 | 0.00  | 0.00 |
| Kopriimonadaceae            | 0.00    | 0.00 | 0.00  | 0.00 | 0.00  | 0.00 | 0.02                     | 0.03 | 0.09  | 0.08 | 0.00  | 0.00 |
| Methylococcaceae            | 0.00    | 0.00 | 0.00  | 0.00 | 0.00  | 0.00 | 0.12                     | 0.13 | 0.08  | 0.09 | 0.00  | 0.00 |
| Acidobacteriaceae           | 0.00    | 0.00 | 0.00  | 0.00 | 0.00  | 0.00 | 0.06                     | 0.07 | 0.05  | 0.09 | 0.01  | 0.01 |
| Staphylococcaceae           | 0.01    | 0.02 | 0.00  | 0.00 | 0.00  | 0.00 | 0.00                     | 0.00 | 0.00  | 0.00 | 0.00  | 0.00 |
| Catabacteriaceae            | 0.01    | 0.01 | 0.03  | 0.06 | 0.00  | 0.00 | 0.01                     | 0.03 | 0.00  | 0.00 | 0.00  | 0.00 |
| Rhodobiaceae                | 0.00    | 0.00 | 0.01  | 0.01 | 0.00  | 0.00 | 0.00                     | 0.00 | 0.00  | 0.00 | 0.00  | 0.00 |
| Micrococcaceae              | 0.00    | 0.00 | 0.00  | 0.00 | 0.00  | 0.00 | 0.01                     | 0.02 | 0.00  | 0.00 | 0.00  | 0.00 |
| Geobacteraceae              | 0.00    | 0.00 | 0.00  | 0.00 | 0.00  | 0.00 | 0.00                     | 0.00 | 0.00  | 0.00 | 0.01  | 0.02 |
| Francisellaceae             | 0.00    | 0.00 | 0.00  | 0.00 | 0.00  | 0.00 | 0.00                     | 0.01 | 0.00  | 0.00 | 0.00  | 0.00 |
| Chlorobiaceae               | 0.00    | 0.00 | 0.00  | 0.00 | 0.00  | 0.00 | 0.00                     | 0.00 | 0.02  | 0.03 | 0.00  | 0.00 |
| Anaerolineaceae             | 0.00    | 0.00 | 0.00  | 0.00 | 0.00  | 0.00 | 0.00                     | 0.01 | 0.00  | 0.00 | 0.00  | 0.00 |
| Spiroplasmataceae           | 0.00    | 0.00 | 0.00  | 0.00 | 0.00  | 0.00 | 0.00                     | 0.01 | 0.00  | 0.00 | 0.01  | 0.02 |
| Bradyrhizobiaceae           | 0.00    | 0.00 | 0.00  | 0.00 | 0.00  | 0.00 | 0.00                     | 0.00 | 0.01  | 0.01 | 0.00  | 0.00 |

Blue: IKK $\beta$  $\Delta$ IEC mice different than control C57BL/6 group at day 0.

Red: Decreased percentage in IKK $\beta$  $\Delta$ IEC mice compared to same group at day 0.

Green: Increased percentage in IKK $\beta$  $\Delta$ IEC mice compared to same group at day 0.



# Table S6. Relative percentage of bacteria species

| Species                              | C57BL/6 |      |       |      |       |      | IKK $\beta$ AIEC |       |       |       |       |                            | Species                      | C57BL/6 |      |       |      |       |      | IKK $\beta$ AIEC |      |       |      |       |      |      |      |
|--------------------------------------|---------|------|-------|------|-------|------|------------------|-------|-------|-------|-------|----------------------------|------------------------------|---------|------|-------|------|-------|------|------------------|------|-------|------|-------|------|------|------|
|                                      | Day 0   |      | Day 2 |      | Day 4 |      | Day 0            |       | Day 2 |       | Day 4 |                            |                              | Day 0   |      | Day 2 |      | Day 4 |      | Day 0            |      | Day 2 |      | Day 4 |      |      |      |
|                                      | Mean    | STD  | Mean  | STD  | Mean  | STD  | Mean             | STD   | Mean  | STD   | Mean  | STD                        |                              | Mean    | STD  | Mean  | STD  | Mean  | STD  | Mean             | STD  | Mean  | STD  | Mean  | STD  |      |      |
| Tamarella sp                         | 38.27   | 5.13 | 34.92 | 6.99 | 31.84 | 5.43 | 49.79            | 38.59 | 2.33  | 33.27 | 4.22  | Sporobacter sp             | 0.01                         | 0.02    | 0.00 | 0.00  | 0.00 | 0.00  | 0.00 | 0.00             | 0.00 | 0.00  | 0.00 | 0.00  | 0.00 |      |      |
| Bacterella intestinihominis          | 5.59    | 1.79 | 4.72  | 1.63 | 5.98  | 0.87 | 3.12             | 2.25  | 1.20  | 0.20  | 0.27  | Prevotella detrita         | 0.15                         | 0.07    | 0.09 | 0.15  | 0.00 | 0.02  | 0.00 | 0.00             | 0.00 | 0.00  | 0.00 | 0.00  | 0.00 |      |      |
| Parabacteroides distasonis           | 0.08    | 0.07 | 0.03  | 0.03 | 0.03  | 0.05 | 2.39             | 1.03  | 6.31  | 2.93  | 0.75  | Blautia putredinis         | 0.00                         | 0.01    | 0.00 | 0.00  | 0.00 | 0.00  | 0.00 | 0.00             | 0.00 | 0.00  | 0.03 | 0.02  | 0.03 | 0.01 |      |
| Coprococcus sp                       | 0.64    | 0.82 | 0.49  | 0.42 | 1.18  | 1.27 | 2.20             | 1.64  | 0.00  | 0.00  | 3.80  | 1.90                       | Prevotella dentans           | 0.14    | 0.12 | 0.84  | 0.81 | 0.28  | 0.36 | 0.00             | 0.00 | 0.00  | 0.00 | 0.00  | 0.00 | 0.00 | 0.00 |
| Candidatus Prevotella conceptinensis | 10.01   | 3.49 | 13.06 | 9.09 | 14.58 | 7.27 | 0.18             | 0.14  | 0.36  | 0.04  | 0.03  | Clostridium proteolyticum  | 0.05                         | 0.04    | 0.01 | 0.02  | 0.02 | 0.02  | 0.02 | 0.03             | 0.01 | 0.04  | 0.01 | 0.00  | 0.00 | 0.00 |      |
| Parabacteroides sp                   | 0.15    | 0.11 | 0.11  | 0.17 | 0.11  | 0.07 | 0.66             | 0.09  | 0.33  | 0.24  | 0.16  | Tannerella forsythia       | 0.00                         | 0.04    | 0.03 | 0.06  | 0.03 | 0.04  | 0.04 | 0.03             | 0.04 | 0.04  | 0.01 | 0.01  | 0.01 | 0.01 |      |
| Parabacteroides sp                   | 0.00    | 0.00 | 0.00  | 0.00 | 0.00  | 0.00 | 0.00             | 0.00  | 0.00  | 0.00  | 0.00  | Lactobacillus flavifaciens | 0.00                         | 0.00    | 0.00 | 0.00  | 0.00 | 0.00  | 0.00 | 0.00             | 0.00 | 0.00  | 0.00 | 0.00  | 0.00 | 0.00 |      |
| Lactococcus lactis                   | 2.90    | 2.03 | 4.43  | 6.40 | 0.59  | 0.54 | 2.18             | 2.56  | 0.77  | 1.30  | 0.31  | Clostridium populi         | 0.07                         | 0.07    | 0.00 | 0.00  | 0.10 | 0.07  | 0.00 | 0.00             | 0.00 | 0.00  | 0.00 | 0.00  | 0.00 | 0.00 |      |
| Bacteroides acidifaciens             | 4.09    | 3.20 | 9.64  | 6.17 | 7.20  | 5.86 | 4.02             | 1.69  | 15.60 | 3.79  | 3.38  | 1.93                       | Clostridium xyloferum        | 0.02    | 0.02 | 0.00  | 0.00 | 0.00  | 0.00 | 0.00             | 0.00 | 0.00  | 0.00 | 0.00  | 0.00 | 0.03 | 0.03 |
| Prevotella sp                        | 9.98    | 1.87 | 9.97  | 2.14 | 8.88  | 1.38 | 12.35            | 3.20  | 4.40  | 1.03  | 22.17 | 3.64                       | Acetivibrio sp               | 0.10    | 0.02 | 0.04  | 0.03 | 0.00  | 0.00 | 0.00             | 0.00 | 0.00  | 0.00 | 0.00  | 0.00 | 0.00 | 0.00 |
| Bacteroides sp                       | 0.70    | 0.24 | 1.05  | 0.30 | 1.05  | 0.41 | 1.16             | 0.65  | 1.58  | 1.40  | 0.12  | 0.64                       | Desulfotuberculum sp         | 0.12    | 0.03 | 0.05  | 0.05 | 0.06  | 0.04 | 0.06             | 0.05 | 0.24  | 0.37 | 0.12  | 0.08 | 0.00 | 0.00 |
| Blautia obeum                        | 0.34    | 0.23 | 0.24  | 0.37 | 0.02  | 0.04 | 1.18             | 0.15  | 0.14  | 0.26  | 0.46  | 0.13                       | Ruminococcus sp              | 0.04    | 0.05 | 0.00  | 0.00 | 0.02  | 0.03 | 0.00             | 0.00 | 0.02  | 0.04 | 0.00  | 0.00 | 0.00 | 0.00 |
| Clostridium sp                       | 3.03    | 1.74 | 2.21  | 1.11 | 2.42  | 0.72 | 2.34             | 0.87  | 2.26  | 1.31  | 14.37 | 5.31                       | Ruminococcus sp              | 0.00    | 0.00 | 0.00  | 0.00 | 0.02  | 0.02 | 0.00             | 0.00 | 0.02  | 0.02 | 0.00  | 0.00 | 0.00 | 0.00 |
| Terribacillus halophilus             | 0.00    | 0.00 | 0.02  | 0.03 | 0.00  | 0.00 | 0.00             | 0.00  | 0.00  | 0.00  | 0.01  | 0.01                       | Phaeosporillum sp            | 0.01    | 0.01 | 0.13  | 0.14 | 0.05  | 0.08 | 0.00             | 0.00 | 0.00  | 0.00 | 0.00  | 0.00 | 0.00 | 0.00 |
| Eubacterium sp                       | 2.35    | 1.52 | 0.45  | 0.22 | 1.42  | 0.99 | 1.54             | 0.97  | 6.55  | 2.34  | 2.04  | 0.89                       | Bacteroides bacterium        | 0.23    | 0.12 | 0.17  | 0.09 | 0.11  | 0.05 | 0.02             | 0.04 | 0.04  | 0.05 | 0.01  | 0.00 | 0.00 | 0.00 |
| Eubacterium tortuosum                | 0.01    | 0.02 | 0.00  | 0.00 | 0.00  | 0.00 | 0.00             | 0.00  | 0.00  | 0.00  | 0.00  | 0.00                       | Catella sp                   | 0.00    | 0.00 | 0.00  | 0.00 | 0.00  | 0.00 | 0.04             | 0.08 | 0.00  | 0.00 | 0.00  | 0.00 | 0.00 | 0.00 |
| Butyrivibrio fibrosolvens            | 0.21    | 0.25 | 0.06  | 0.03 | 0.07  | 0.04 | 0.06             | 0.11  | 0.01  | 0.03  | 0.14  | 0.07                       | Tropea sp                    | 0.00    | 0.00 | 0.00  | 0.00 | 0.00  | 0.00 | 0.02             | 0.03 | 0.49  | 0.54 | 0.00  | 0.00 | 0.00 | 0.00 |
| Blautia sp                           | 0.01    | 0.01 | 0.00  | 0.00 | 0.03  | 0.04 | 0.08             | 0.10  | 0.13  | 0.23  | 0.05  | 0.06                       | Genella morbillorum          | 0.00    | 0.00 | 0.00  | 0.00 | 0.00  | 0.00 | 0.02             | 0.03 | 0.00  | 0.00 | 0.02  | 0.04 | 0.00 | 0.00 |
| Porphyromonadaceae                   | 0.44    | 0.25 | 0.63  | 0.24 | 0.44  | 0.14 | 0.30             | 0.24  | 0.18  | 0.15  | 0.27  | 0.05                       | Ruminococcus sp              | 0.04    | 0.03 | 0.10  | 0.13 | 0.03  | 0.04 | 0.02             | 0.04 | 0.01  | 0.01 | 0.00  | 0.00 | 0.00 | 0.00 |
| Roseburia sp                         | 0.06    | 0.05 | 0.00  | 0.01 | 0.01  | 0.01 | 0.00             | 0.01  | 0.00  | 0.00  | 0.03  | 0.04                       | Streptococcus constellatus   | 0.00    | 0.00 | 0.00  | 0.00 | 0.00  | 0.00 | 0.12             | 0.08 | 0.00  | 0.00 | 0.00  | 0.07 | 0.12 | 0.00 |
| Clostridium nexile                   | 4.63    | 3.28 | 0.80  | 1.01 | 7.23  | 5.14 | 0.27             | 0.15  | 0.11  | 0.08  | 1.63  | 0.52                       | Alistipes finegoldii         | 0.00    | 0.00 | 0.00  | 0.00 | 0.00  | 0.00 | 0.02             | 0.04 | 0.00  | 0.00 | 0.01  | 0.02 | 0.00 | 0.00 |
| Enterococcus gallinarum              | 0.00    | 0.00 | 0.02  | 0.03 | 0.00  | 0.00 | 0.00             | 0.00  | 0.00  | 0.00  | 0.00  | 0.00                       | Lactobacillus sp             | 0.00    | 0.00 | 0.00  | 0.00 | 0.00  | 0.00 | 0.00             | 0.00 | 0.00  | 0.00 | 0.00  | 0.00 | 0.02 | 0.02 |
| Enterococcus sp                      | 2.51    | 1.17 | 1.14  | 0.54 | 1.71  | 0.79 | 1.01             | 0.15  | 0.04  | 0.11  | 0.91  | 0.15                       | Dysgonomus sp                | 0.00    | 0.00 | 0.01  | 0.02 | 0.01  | 0.01 | 0.00             | 0.00 | 0.00  | 0.00 | 0.00  | 0.00 | 0.00 | 0.00 |
| Mucinipillum schaedleri              | 0.30    | 0.25 | 0.05  | 0.02 | 0.30  | 0.27 | 0.03             | 0.02  | 0.06  | 0.10  | 1.02  | 0.29                       | Lactobacillus murinus        | 0.00    | 0.00 | 0.02  | 0.02 | 0.04  | 0.04 | 0.03             | 0.03 | 0.00  | 0.00 | 0.00  | 0.00 | 0.00 | 0.00 |
| Bacteroides sartorii                 | 0.00    | 0.00 | 0.00  | 0.00 | 0.00  | 0.00 | 1.32             | 0.91  | 2.93  | 0.86  | 0.50  | 0.36                       | Prevotella albensis          | 0.03    | 0.02 | 0.02  | 0.02 | 0.04  | 0.04 | 0.03             | 0.03 | 0.00  | 0.00 | 0.00  | 0.00 | 0.00 | 0.00 |
| Enterococcus sp                      | 0.00    | 0.00 | 0.04  | 0.04 | 0.01  | 0.02 | 0.00             | 0.00  | 0.03  | 0.04  | 0.00  | 0.00                       | Gelidibacter sp              | 0.00    | 0.00 | 0.02  | 0.02 | 0.01  | 0.01 | 0.00             | 0.01 | 0.00  | 0.00 | 0.00  | 0.00 | 0.00 | 0.00 |
| Clostridium xylanolyticum            | 0.04    | 0.05 | 0.02  | 0.02 | 0.05  | 0.04 | 0.06             | 0.09  | 0.01  | 0.01  | 0.03  | 0.03                       | Helicobacter mastotyrinus    | 0.00    | 0.00 | 0.00  | 0.00 | 0.00  | 0.00 | 0.08             | 0.12 | 0.00  | 0.00 | 0.00  | 0.01 | 0.02 | 0.00 |
| Clostridium indolis                  | 1.18    | 1.22 | 0.44  | 0.63 | 0.86  | 0.50 | 1.18             | 0.15  | 0.14  | 0.24  | 0.64  | 0.23                       | Haemophilus sp               | 0.00    | 0.00 | 0.00  | 0.00 | 0.00  | 0.00 | 0.00             | 0.00 | 0.00  | 0.00 | 0.00  | 0.00 | 0.00 | 0.00 |
| Bacteroides chinchibae               | 0.00    | 0.00 | 0.00  | 0.00 | 0.00  | 0.00 | 0.70             | 0.36  | 1.70  | 0.38  | 0.34  | 0.31                       | Anaerophaga thermophilophila | 0.00    | 0.01 | 0.01  | 0.01 | 0.00  | 0.00 | 0.00             | 0.00 | 0.00  | 0.00 | 0.00  | 0.00 | 0.00 | 0.00 |
| Alistipes onderdonkii                | 0.93    | 0.45 | 0.01  | 0.01 | 0.27  | 0.22 | 0.80             | 0.38  | 0.18  | 0.17  | 5.37  | 4.50                       | Clostridium ramosum          | 0.00    | 0.00 | 0.00  | 0.00 | 0.00  | 0.00 | 0.00             | 0.00 | 0.00  | 0.00 | 0.00  | 0.00 | 0.00 | 0.00 |
| Roseburia sp                         | 0.51    | 0.39 | 0.01  | 0.01 | 0.44  | 0.14 | 0.04             | 0.03  | 0.05  | 0.04  | 0.26  | 0.14                       | Butyrivibrio cacaecolentis   | 0.00    | 0.00 | 0.00  | 0.00 | 0.00  | 0.00 | 0.04             | 0.06 | 0.00  | 0.00 | 0.00  | 0.01 | 0.01 | 0.00 |
| Alistipes sp                         | 0.10    | 0.07 | 0.26  | 0.12 | 0.11  | 0.08 | 0.00             | 0.00  | 0.01  | 0.02  | 0.02  | 0.02                       | Butyrivibrio synergeticus    | 0.00    | 0.00 | 0.00  | 0.00 | 0.00  | 0.00 | 0.01             | 0.03 | 0.00  | 0.00 | 0.00  | 0.00 | 0.00 | 0.00 |
| Streptococcus sp                     | 0.02    | 0.04 | 0.00  | 0.00 | 0.00  | 0.00 | 0.00             | 0.00  | 0.05  | 0.00  | 0.05  | 0.03                       | Bacteriostreptococcus        | 0.01    | 0.02 | 0.00  | 0.00 | 0.05  | 0.06 | 0.00             | 0.00 | 0.00  | 0.00 | 0.00  | 0.00 | 0.00 | 0.00 |
| Eubacterium ramulus                  | 0.24    | 0.46 | 0.00  | 0.00 | 0.16  | 0.15 | 0.64             | 0.33  | 0.01  | 0.03  | 2.77  | 2.06                       | Pseudomonas sp               | 0.00    | 0.00 | 0.00  | 0.00 | 0.00  | 0.00 | 0.04             | 0.04 | 0.00  | 0.00 | 0.00  | 0.01 | 0.01 | 0.00 |
| Parabacteroides merdae               | 0.00    | 0.00 | 0.00  | 0.00 | 0.00  | 0.00 | 0.29             | 0.11  | 0.32  | 0.15  | 0.16  | 0.17                       | Acetivibrio granulum         | 0.00    | 0.00 | 0.00  | 0.00 | 0.00  | 0.00 | 0.01             | 0.02 | 0.00  | 0.00 | 0.00  | 0.00 | 0.00 | 0.00 |
| Parasuterella excrementihominis      | 0.04    | 0.02 | 0.19  | 0.16 | 0.05  | 0.05 | 0.56             | 0.56  | 0.63  | 0.87  | 0.32  | 0.13                       | Eumecostium coli             | 0.00    | 0.00 | 0.00  | 0.00 | 0.00  | 0.00 | 0.01             | 0.02 | 0.00  | 0.00 | 0.00  | 0.00 | 0.00 | 0.00 |
| Eubacterium xylanophilum             | 0.24    | 0.19 | 0.12  | 0.21 | 0.26  | 0.14 | 0.04             | 0.08  | 0.00  | 0.11  | 0.38  | 0.31                       | Faecalibacterium sp          | 0.00    | 0.00 | 0.02  | 0.02 | 0.02  | 0.02 | 0.01             | 0.02 | 0.01  | 0.02 | 0.00  | 0.00 | 0.00 | 0.00 |
| Oscillibacter sp                     | 0.74    | 0.54 | 0.38  | 0.39 | 0.63  | 0.24 | 0.10             | 0.11  | 0.07  | 0.11  | 0.28  | 0.03                       | Streptomyces sp              | 0.03    | 0.01 | 0.03  | 0.05 | 0.02  | 0.03 | 0.00             | 0.01 | 0.00  | 0.00 | 0.00  | 0.00 | 0.00 | 0.00 |
| Streptococcus lacteus                | 0.00    | 0.00 | 0.00  | 0.00 | 0.00  | 0.00 | 0.00             | 0.69  | 0.12  | 0.46  | 0.80  | 0.02                       | Prevotella loescheii         | 0.07    | 0.05 | 0.05  | 0.03 | 0.01  | 0.01 | 0.00             | 0.00 | 0.01  | 0.03 | 0.00  | 0.00 | 0.00 | 0.00 |
| Odoribacter lanicus                  | 0.01    | 0.02 | 0.03  | 0.05 | 0.02  | 0.03 | 0.01             | 0.03  | 0.00  | 0.00  | 0.94  | 0.16                       | Zhangella mubiis             | 0.00    | 0.00 | 0.02  | 0.02 | 0.01  | 0.01 | 0.00             | 0.00 | 0.00  | 0.00 | 0.00  | 0.00 | 0.00 | 0.00 |
| Ruminococcus sp                      | 0.65    | 0.33 | 0.50  | 0.15 | 0.51  | 0.19 | 0.01             | 0.03  | 0.00  | 0.00  | 0.01  | 0.01                       | Streptococcus pleomorphaus   | 0.00    | 0.00 | 0.00  | 0.00 | 0.00  | 0.00 | 0.00             | 0.00 | 0.00  | 0.00 | 0.00  | 0.01 | 0.02 | 0.00 |
| Ruminococcus sp                      | 0.15    | 0.04 | 0.33  | 0.37 | 0.22  | 0.15 | 0.05             | 0.03  | 0.01  | 0.01  | 0.22  | 0.22                       | Shackia piriformis           | 0.00    | 0.00 | 0.00  | 0.00 | 0.00  | 0.00 | 0.00             | 0.01 | 0.00  | 0.00 | 0.00  | 0.00 | 0.00 | 0.00 |
| Parabacteroides goldsteini           | 0.01    | 0.01 | 2.77  | 1.42 | 0.09  | 0.10 | 0.00             | 0.01  | 0.36  | 0.34  | 0.01  | 0.01                       | Nitastella sp                | 0.01    | 0.02 | 0.00  | 0.00 | 0.00  | 0.00 | 0.00             | 0.00 | 0.00  | 0.00 | 0.00  | 0.00 | 0.00 | 0.00 |
| Eubacterium leptum                   | 0.05    | 0.03 | 0.01  | 0.01 | 0.01  | 0.01 | 0.00             | 0.01  | 0.04  | 0.04  | 0.02  | 0.04                       | Flexibacter sp               | 0.00    | 0.00 | 0.01  | 0.02 | 0.00  | 0.00 | 0.00             | 0.00 | 0.00  | 0.00 | 0.00  | 0.00 | 0.00 | 0.00 |
| Anaerostipes cacaecae                | 0.50    | 0.59 | 0.00  | 0.00 | 0.00  | 0.00 | 0.00             | 0.00  | 0.00  | 0.00  | 0.00  | 0.00                       | Prevotella buccae            | 0.00    | 0.01 | 0.00  | 0.00 | 0.01  | 0.01 | 0.00             | 0.00 | 0.00  | 0.00 | 0.00  | 0.00 | 0.00 | 0.00 |
| Parabacteroides merdae               | 0.07    | 0.06 | 0.02  | 0.03 | 0.10  | 0.15 | 0.06             | 0.13  | 0.29  | 0.51  | 1.15  | 1.87                       | Desulfuromonas sp            | 0.00    | 0.00 | 0.01  | 0.01 | 0.02  | 0.00 | 0.00             | 0.01 | 0.01  | 0.01 | 0     |      |      |      |



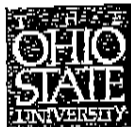

College of Veterinary Medicine

Department of Veterinary Biosciences  
1925 Coffey Road  
Columbus, Ohio 43210-1093

Phone 614-292-4489  
Fax 614-292-6473  
www.vet.ohio-state.edu/biosciences.htm

**FAX TRANSMITTIAL PAGE  
PLEASE FORWARD IMMEDIATELY**

To: Nature Publishing  
Fax# 508-276-0594  
From: Prosper BOYAKA  
Phone: 614-247-4671

Number of pages including this cover page: 03

If you do not receive all pages, please call (614) 292-5661.

**MESSAGE:**

license to Publish & Artwork forms

# ARTWORK AND SUPPLEMENTARY INFORMATION PRODUCTION FORM

This form must be completed for all papers. We are unable to process your paper until we receive instructions concerning artwork and supplementary files.

Please return this form to via fax to: + 1 508 276-0694

Journal: Mucosal Immunology

Article Title IKK $\beta$  in intestinal epithelial cells regulates allergen-specific IgA and allergic inflammation at distant mucosal sites

Manuscript Number: MI-12-323.R1

## A. Does Your Article Have Color Artwork for Print Publication?

No.

Yes. I agree to pay the color charges in full and hereby authorize Nature Publishing Group to invoice me for the cost of reproducing color artwork in print. There is no charge for publishing black and white figures.

Note: The cost for reproducing color artwork in print is \$613 per page. Color figures will be set close to the citation and in the best possible position. Figure re-ordering cannot be undertaken at proof stage to reduce the number of pages featuring color artwork.

Which figures? (e.g. Figures 1a, 2, 3b)

Figures 1A, 2C, 5, 7 (total 4 x \$613 = \$2,452)

## B. Do You Have Figures for Reproduction in Color on the Online Full Text HTML Version Only?

No.

Yes. I am supplying figures for color reproduction for the online full text HTML version. These figures will also be supplied as separate black and white files for the print and online PDF versions.

Note: There is no charge for reproducing color figures for the online full text HTML version published online. Please note that color will appear in the full text HTML version only, and not in the online PDF version.

Which figures? (e.g. Figures 1c, 5, 6)

figures 1, 2, 5, 7

## C. Does Your Article Have Supplementary (online-only) Information?

No.

Yes. I agree to pay the Supplementary Information charges in full and hereby authorize Nature Publishing Group to invoice me for the amount below.

Note: Supplementary Information is charged at \$125.00 for each file.

3 file(s) x \$125.00 Total amount: \$ 375

What material is supplied as Supplementary Information?

Text, Figures, Tables

Signature: Prosper Boyaka

Print Name: PROSPER BOYAKA Date: 5/14/2013

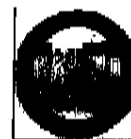

LICENSE TO PUBLISH

Please FAX this completed form to +1 508-276-0594, Attention: Jason Roberts

Manuscript #: MI-12-323.R1 Mucosal Immunology

Title of the contribution: IκB in intestinal epithelial cells regulates allergen-specific IgA and allergic inflammation of

Author(s): (names only) Bonnegard-Bernard, Jee, Fial, Aeffner, Cormet-Boyaka, Davis, Lin, Tomé, Karin, Sun, Boyaka

To: The Society for Mucosal Immunology ("SMI")

- 1. In consideration of SMI agreeing to publish the Contribution the Authors grant to SMI for the full term of copyright in the Contribution and any extensions thereto, subject to clause 2 below, the exclusive license (a) to publish, reproduce, distribute, display and store the Contribution in all forms, formats and media whether now known or hereafter developed (including without limitation in print, digital and electronic form) throughout the world, (b) to translate the Contribution into other languages, create adaptations, summaries or extracts of this Contribution or other derivative works based on the Contribution and exercise all of the rights set forth in (a) above in such translations, adaptations, summaries, extracts and derivative works and (c) to license others to do any or all of the above.
2. Ownership of copyright remains with the Authors, and provided that, when reproducing the Contribution or extracts from it, the Authors acknowledge first and reference publication in this Journal, the Authors retain the following non-exclusive rights:
a) To reproduce the Contribution in whole or in part in any printed volume (book or thesis) of which they are the author(s).
b) They and any academic institution where they work at the time may reproduce the Contribution for the purpose of course teaching.
c) To post a copy of the Contribution as accepted for publication after peer review (in Word or Tex format) on the Author's own web site, or the Author's institutional repository, or the Author's funding body's archive, six months after publication of the printed or online edition of the Journal, provided that they also link to the Journal article on NPG's web site (eg through the DOI).
d) To reuse figures or tables created by them and contained in the Contribution in other works created by them.
3. The Authors warrant and represent that:
a) The Authors are the sole authors of and sole owners of the copyright in the Contribution. If the Contribution includes materials of others, the Authors have obtained the permission of the owners of the copyright in all such materials to enable them to grant the rights contained herein. Copies of all such permissions are attached to this license.
b) All of the facts contained in the Contribution are true and accurate.
c) The Author who has signed this Agreement has full right, power and authority to enter into this Agreement on behalf of all of the Authors.
d) Nothing in the Contribution is obscene, defamatory, libelous, violates any right of privacy or infringes any intellectual property rights (including without limitation copyright, patent or trademark) or any other human, personal or other rights of any person or entity or is otherwise unlawful.
e) Nothing in the Contribution infringes any duty of confidentiality which any of the Authors may owe to anyone else or violates any contract, express or implied, of any of the Authors, and all of the institutions in which work recorded in the Contribution was carried out have authorized publication of the Contribution.
4. The Authors authorize SMI to take such steps as it considers necessary at its own expense in the Authors' name and on their behalf if it believes that a third party is infringing or is likely to infringe copyright in the Contribution.

This Agreement and the rights and liabilities of the parties with respect to this Agreement and its subject matter, shall be governed by the laws of the State of New York, without reference to the principles of conflicts of laws thereof.

Signed for and on behalf of the Authors: Prosper Boyaka Date: 5/14/2013

Please print name: PROSPER BOYAKA

Address: 1900 Coffey Road, Vn AB 354 Columbus, OH 43210

distant mucosal sites
